# Supplementary material for: Assessing and evaluating human-wildlife interactions for coexistence in shared landscapes
Source: Frontiers journal article supplement (doi:10.3389/fcosc.2024.1456072), 2025-01-06
Supplement: Table_1.docx [file Table_1.docx]

**Assessing and evaluating human-wildlife interactions for coexistence in shared landscapes**

Ferraz*, K.M.P.M.d. B., Bento, I.d.F., Di Souza, A.B.Q., Nunes, C.d.S., Guimarães, M.A.d.M., Pereira, M.S., da Silva, L.L., de Campos, L.K.N., Gobbi, A.S., Alves, J.C.Q., Alvarez, L.F.P., Marchini, S., de Aquino, A.C.M.M., Sato, V.K.d.M., Paolino, R.M.

***** katia.ferraz@usp.br

**Supplementary figures and tables**

**Table S1**. Table for recording events between humans and wildlife.

| Field | Description |
| --- | --- |
| ID | Event identification. |
| Date | Date when the event was recorded. |
| Time | The exact or estimated time when the event was recorded. |
| GPS coordinates | GPS coordinates of the event. |
| Precision (yes/no) | Are the GPS coordinates precise (yes) or estimated (no)? |
| Class | From which class is the involved animal?: mammals, birds, amphibia, reptiles… |
| Order | From which order is the involved animal? (e.g.: Passeriformes, Carnivora, Primates, Squamata…) |
| mily | From which family is the involved animal? (e.g.: Anatidae, Felidae, Viperidae…) |
| Main classification | For the analysis of events, if more than one species is to be grouped into different categories (e.g., venomous and non-venomous snakes; Passeriformes; Anura, Anseriformes...), use this field to indicate the category which they will be classified into. |
| Common name | Common name of the involved species. |
| Scientific name | Scientific name of the involved species. |
| Number of individuals | How many individuals of this species/taxon were involved in the event? |
| Place | A detailed description of the place where the event occurred. |
| Content | A detailed description of the event, including information about exactly what happened in the situation. |
| Context | A detailed description of the situation under which the event occurred, such as information about the landscape. |
| Effect for human | Positive, negative or neutral effect. |
| Effect for animal | Positive, negative or neutral effect. |
| Uni or bidirectional | Unidirectional if the event had neutral effects for one of the parts (humans or wildlife) involved in the interaction or bidirectional if the event had effects (negative or positive) for both parts. |
| Type of interaction | If interaction, include the type of the interaction according to Supplemental Table S1 (this paper). |
| Pictures or videos | External link of possible event records such as videos or photos. |
